# Supplementary material for: Bone biology in the elderly: clinical importance for fracture treatment
Source: PubMed Central journal article supplement — Innov Surg Sci. 2016 Dec 8;1(2):49–55. doi: 10.1515/iss-2016-0025 (PMC6753994; doi:10.1515/iss-2016-0025), 2016-12-08
Supplement: iss-1-20160025-s001.pdf [file iss-1-20160025-s001.pdf]

## Reviewer Assessment

## Open Access

Tim Rolvien and Michael Amling\*

# Bone biology in the elderly: clinical importance for fracture treatment

DOI 10.1515/iss-2016-0025

Received October 1, 2016; accepted November 15, 2016

\*Corresponding author: Michael Amling,

Department of Osteology and Biomechanics, University Medical Center Hamburg-Eppendorf, Lottestr. 59, 22529 Hamburg, Germany, E-mail: amling@uke.de

## Reviewers' Comments to Original Submission

### Reviewer 1: anonymous

Oct 03, 2016

| <b>Reviewer Recommendation Term:</b>                              | Accept       |
|-------------------------------------------------------------------|--------------|
| <b>Overall Reviewer Manuscript Rating:</b>                        | 100          |
| Custom Review Question(s)                                         | Response     |
| Is the subject area appropriate for you?                          | 5 - High/Yes |
| Does the title clearly reflect the paper's content?               | 5 - High/Yes |
| Does the abstract clearly reflect the paper's content?            | 5 - High/Yes |
| Do the keywords clearly reflect the paper's content?              | 5 - High/Yes |
| Does the introduction present the problem clearly?                | 5 - High/Yes |
| Are the results/conclusions justified?                            | 5 - High/Yes |
| How comprehensive and up-to-date is the subject matter presented? | 5 - High/Yes |
| How adequate is the data presentation?                            | 5 - High/Yes |
| Are units and terminology used correctly?                         | 5 - High/Yes |
| Is the number of cases adequate?                                  | 5 - High/Yes |
| Are the experimental methods/clinical studies adequate?           | 5 - High/Yes |
| Is the length appropriate in relation to the content?             | 5 - High/Yes |
| Does the reader get new insights from the article?                | 5 - High/Yes |
| Please rate the practical significance.                           | 5 - High/Yes |
| Please rate the accuracy of methods.                              | N/A          |
| Please rate the statistical evaluation and quality control.       | N/A          |
| Please rate the appropriateness of the figures and tables.        | 5 - High/Yes |
| Please rate the appropriateness of the references.                | 5 - High/Yes |
| Please evaluate the writing style and use of language.            | 5 - High/Yes |
| Please judge the overall scientific quality of the manuscript.    | 5 - High/Yes |
| Are you willing to review the revision of this manuscript?        | Yes          |
| Comments to Author:                                               |              |
| -                                                                 |              |

**Reviewer 2: Richard Stange**

Nov 15, 2016

| <b>Reviewer Recommendation Term:</b>                                                                                                                                                                                                                                                                                                                                                                                                                                                                                                                                                                                                                                                                                                                                                                                                                                                                                                                                                                                                                                                                                                                                                                                                                                                                                                                                                      | Accept          |
|-------------------------------------------------------------------------------------------------------------------------------------------------------------------------------------------------------------------------------------------------------------------------------------------------------------------------------------------------------------------------------------------------------------------------------------------------------------------------------------------------------------------------------------------------------------------------------------------------------------------------------------------------------------------------------------------------------------------------------------------------------------------------------------------------------------------------------------------------------------------------------------------------------------------------------------------------------------------------------------------------------------------------------------------------------------------------------------------------------------------------------------------------------------------------------------------------------------------------------------------------------------------------------------------------------------------------------------------------------------------------------------------|-----------------|
| <b>Overall Reviewer Manuscript Rating:</b>                                                                                                                                                                                                                                                                                                                                                                                                                                                                                                                                                                                                                                                                                                                                                                                                                                                                                                                                                                                                                                                                                                                                                                                                                                                                                                                                                | N/A             |
| <b>Custom Review Question(s)</b>                                                                                                                                                                                                                                                                                                                                                                                                                                                                                                                                                                                                                                                                                                                                                                                                                                                                                                                                                                                                                                                                                                                                                                                                                                                                                                                                                          | <b>Response</b> |
| Is the subject area appropriate for you?                                                                                                                                                                                                                                                                                                                                                                                                                                                                                                                                                                                                                                                                                                                                                                                                                                                                                                                                                                                                                                                                                                                                                                                                                                                                                                                                                  | 5 - High/Yes    |
| Does the title clearly reflect the paper's content?                                                                                                                                                                                                                                                                                                                                                                                                                                                                                                                                                                                                                                                                                                                                                                                                                                                                                                                                                                                                                                                                                                                                                                                                                                                                                                                                       | 5 - High/Yes    |
| Does the abstract clearly reflect the paper's content?                                                                                                                                                                                                                                                                                                                                                                                                                                                                                                                                                                                                                                                                                                                                                                                                                                                                                                                                                                                                                                                                                                                                                                                                                                                                                                                                    | 5 - High/Yes    |
| Do the keywords clearly reflect the paper's content?                                                                                                                                                                                                                                                                                                                                                                                                                                                                                                                                                                                                                                                                                                                                                                                                                                                                                                                                                                                                                                                                                                                                                                                                                                                                                                                                      | 5 - High/Yes    |
| Does the introduction present the problem clearly?                                                                                                                                                                                                                                                                                                                                                                                                                                                                                                                                                                                                                                                                                                                                                                                                                                                                                                                                                                                                                                                                                                                                                                                                                                                                                                                                        | 4               |
| Are the results/conclusions justified?                                                                                                                                                                                                                                                                                                                                                                                                                                                                                                                                                                                                                                                                                                                                                                                                                                                                                                                                                                                                                                                                                                                                                                                                                                                                                                                                                    | 5 - High/Yes    |
| How comprehensive and up-to-date is the subject matter presented?                                                                                                                                                                                                                                                                                                                                                                                                                                                                                                                                                                                                                                                                                                                                                                                                                                                                                                                                                                                                                                                                                                                                                                                                                                                                                                                         | 5 - High/Yes    |
| How adequate is the data presentation?                                                                                                                                                                                                                                                                                                                                                                                                                                                                                                                                                                                                                                                                                                                                                                                                                                                                                                                                                                                                                                                                                                                                                                                                                                                                                                                                                    | N/A             |
| Are units and terminology used correctly?                                                                                                                                                                                                                                                                                                                                                                                                                                                                                                                                                                                                                                                                                                                                                                                                                                                                                                                                                                                                                                                                                                                                                                                                                                                                                                                                                 | 5 - High/Yes    |
| Is the number of cases adequate?                                                                                                                                                                                                                                                                                                                                                                                                                                                                                                                                                                                                                                                                                                                                                                                                                                                                                                                                                                                                                                                                                                                                                                                                                                                                                                                                                          | N/A             |
| Are the experimental methods/clinical studies adequate?                                                                                                                                                                                                                                                                                                                                                                                                                                                                                                                                                                                                                                                                                                                                                                                                                                                                                                                                                                                                                                                                                                                                                                                                                                                                                                                                   | N/A             |
| Is the length appropriate in relation to the content?                                                                                                                                                                                                                                                                                                                                                                                                                                                                                                                                                                                                                                                                                                                                                                                                                                                                                                                                                                                                                                                                                                                                                                                                                                                                                                                                     | 3               |
| Does the reader get new insights from the article?                                                                                                                                                                                                                                                                                                                                                                                                                                                                                                                                                                                                                                                                                                                                                                                                                                                                                                                                                                                                                                                                                                                                                                                                                                                                                                                                        | 4               |
| Please rate the practical significance.                                                                                                                                                                                                                                                                                                                                                                                                                                                                                                                                                                                                                                                                                                                                                                                                                                                                                                                                                                                                                                                                                                                                                                                                                                                                                                                                                   | 5 - High/Yes    |
| Please rate the accuracy of methods.                                                                                                                                                                                                                                                                                                                                                                                                                                                                                                                                                                                                                                                                                                                                                                                                                                                                                                                                                                                                                                                                                                                                                                                                                                                                                                                                                      | N/A             |
| Please rate the statistical evaluation and quality control.                                                                                                                                                                                                                                                                                                                                                                                                                                                                                                                                                                                                                                                                                                                                                                                                                                                                                                                                                                                                                                                                                                                                                                                                                                                                                                                               | N/A             |
| Please rate the appropriateness of the figures and tables.                                                                                                                                                                                                                                                                                                                                                                                                                                                                                                                                                                                                                                                                                                                                                                                                                                                                                                                                                                                                                                                                                                                                                                                                                                                                                                                                | 3               |
| Please rate the appropriateness of the references.                                                                                                                                                                                                                                                                                                                                                                                                                                                                                                                                                                                                                                                                                                                                                                                                                                                                                                                                                                                                                                                                                                                                                                                                                                                                                                                                        | 4               |
| Please evaluate the writing style and use of language.                                                                                                                                                                                                                                                                                                                                                                                                                                                                                                                                                                                                                                                                                                                                                                                                                                                                                                                                                                                                                                                                                                                                                                                                                                                                                                                                    | 5 - High/Yes    |
| Please judge the overall scientific quality of the manuscript.                                                                                                                                                                                                                                                                                                                                                                                                                                                                                                                                                                                                                                                                                                                                                                                                                                                                                                                                                                                                                                                                                                                                                                                                                                                                                                                            | 3               |
| Are you willing to review the revision of this manuscript?                                                                                                                                                                                                                                                                                                                                                                                                                                                                                                                                                                                                                                                                                                                                                                                                                                                                                                                                                                                                                                                                                                                                                                                                                                                                                                                                | Yes             |
| <b>Comments to Author:</b>                                                                                                                                                                                                                                                                                                                                                                                                                                                                                                                                                                                                                                                                                                                                                                                                                                                                                                                                                                                                                                                                                                                                                                                                                                                                                                                                                                |                 |
| <p>The review article addresses the important topic of age related impairment of bone quality and importance of fragility fracture treatment. The experienced authors provide a good overview of the underlying bone biology in the elderly and the current state of the art of post fracture treatment of bone disorders like osteoporosis, osteomalacia or vitamin D deficiency. The author emphasize the cooperation between the trauma surgeon treating the fracture and the osteologist taking over the after treatment of bone disease. The current state-of-the-art investigation methods are presented and explained regarding their usefulness with regards to the underlying pathology. The authors postulate an enhanced effort in order to overcome the current undertreatment of bone diseases in the elderly with fragility fractures.</p> <p>The article gives a good overview of the increasing problem of age-related fragility fracture and the insufficiency of after treatment of underlying bone diseases. It reflects and summarizes the current literature about this topic and gives advice for the treatment of those patients.</p> <p>For clinical application and daily work, some additional practical implications for the management of patients with fragility fracture or the mentioned fracture liaison service might be helpful and could be added.</p> |                 |
